# Supplementary material for: Prediction model of hepatocellular carcinoma risk in Asian patients with chronic hepatitis B treated with entecavir
Source: PubMed Central journal article supplement (PMC5696194; doi:10.18632/oncotarget.21369), 2017-09-28
Supplement: oncotarget-08-92431-s001.pdf [file oncotarget-08-92431-s001.pdf]

# Prediction model of hepatocellular carcinoma risk in Asian patients with chronic hepatitis B treated with entecavir

## SUPPLEMENTARY MATERIALS

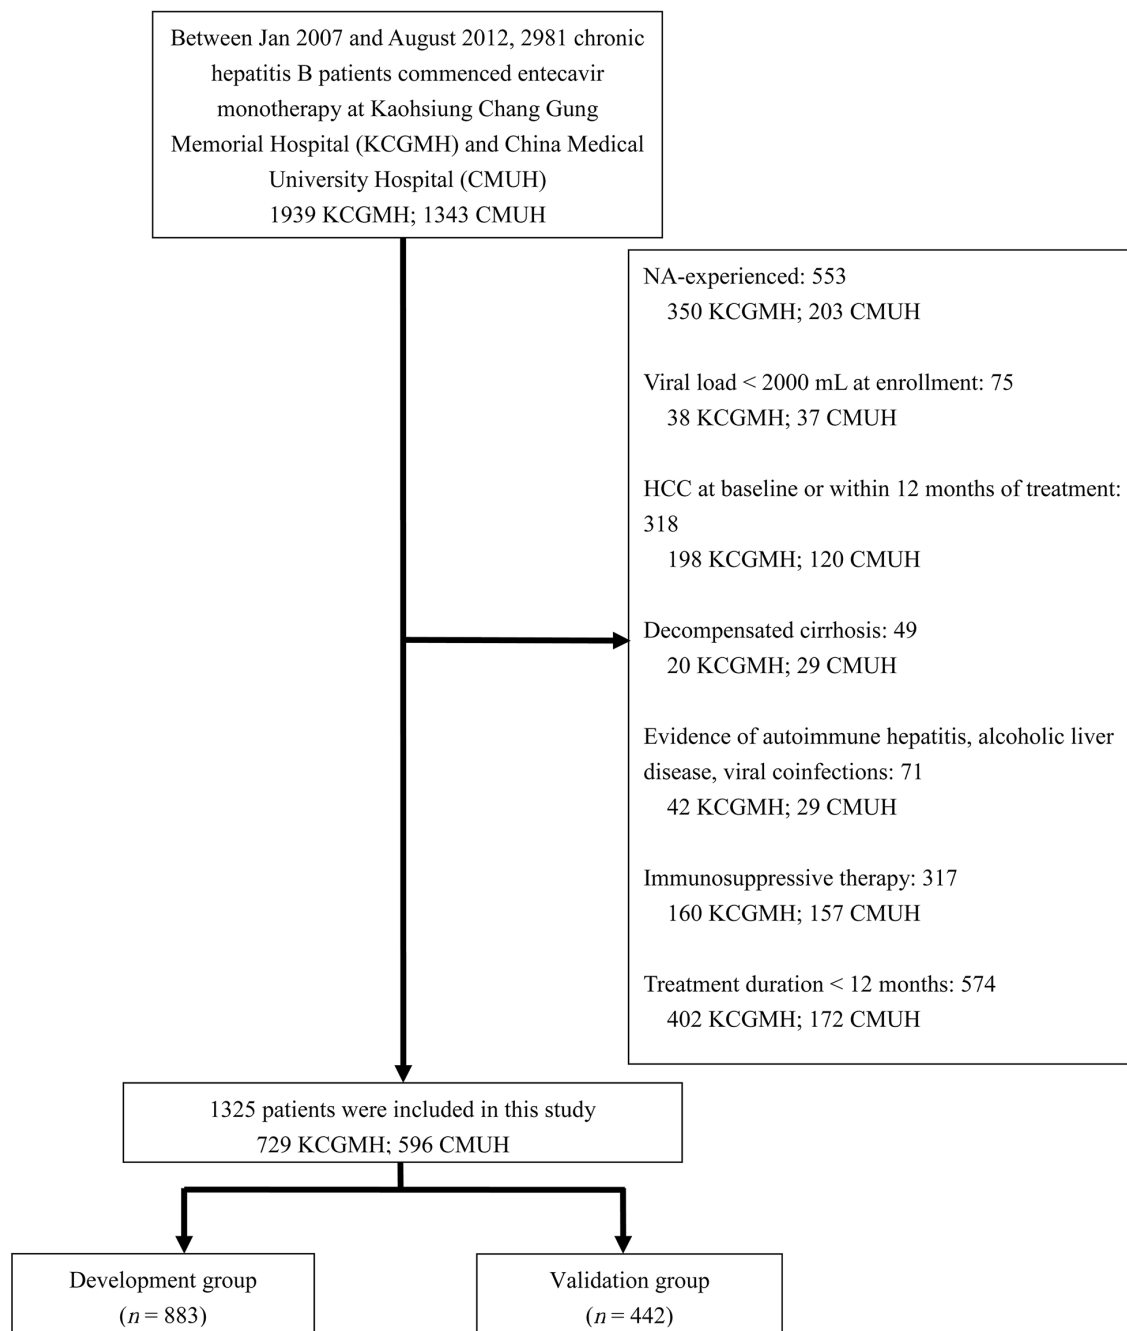

**Supplementary Figure 1: Flow chart of patients enrolled in this study.** HCC, hepatocellular carcinoma; NA, nucleos(t)ide analog.

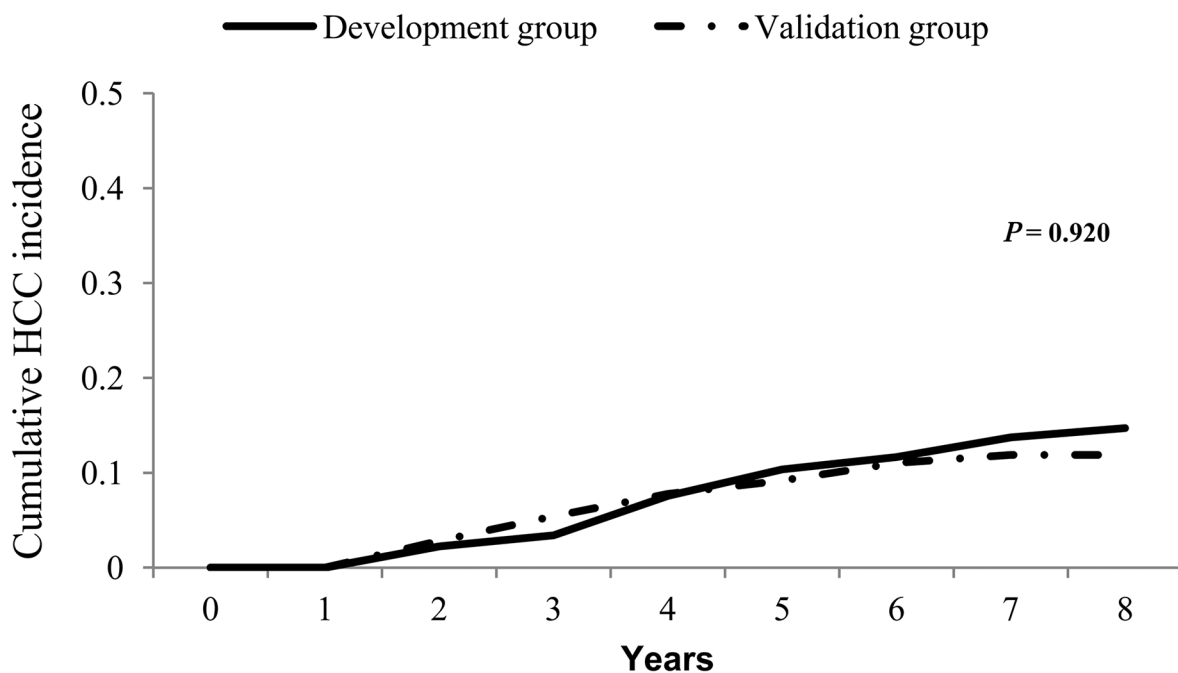

**Number at risk**

|                   |     |     |     |     |     |     |     |     |    |
|-------------------|-----|-----|-----|-----|-----|-----|-----|-----|----|
| Development group | 883 | 883 | 783 | 557 | 406 | 293 | 193 | 116 | 45 |
| Validation group  | 442 | 442 | 399 | 272 | 212 | 166 | 108 | 60  | 23 |

**Supplementary Figure 2: Cumulative incidence rates of HCC in the development and validation groups of CHB-naïve patients treated with entecavir.** HCC, hepatocellular carcinoma; CHB, chronic hepatitis B.

**Supplementary Table 1: Clinical characteristics of the development and validation groups.**

See Supplementary File 1

**Supplementary Table 2: Univariate and multivariate analyses of baseline factors associated with hepatocellular carcinoma in the development group ( $n = 883$ )**

| Variables                                      | Univariate analysis   |                | Multivariate analysis |                |
|------------------------------------------------|-----------------------|----------------|-----------------------|----------------|
|                                                | Hazard ratio (95% CI) | <i>P</i> value | Hazard ratio (95% CI) | <i>P</i> value |
| Age (year)                                     | 1.058 (1.036–1.080)   | < 0.001        | 1.048 (1.026–1.069)   | < 0.0001       |
| Sex, male vs female                            | 1.015 (0.593–1.737)   | 0.958          |                       |                |
| HBV genotype, C vs B                           | 1.472 (0.919–2.357)   | 0.105          |                       |                |
| HBeAg, yes or no                               | 0.704 (0.412–1.205)   | 0.201          |                       |                |
| HBV DNA, per log <sub>10</sub> IU/mL           | 0.827 (0.704–0.971)   | 0.021          |                       |                |
| Diabetes mellitus, yes vs no                   | 2.640 (1.510–4.615)   | 0.001          |                       |                |
| Family history of HCC, yes vs no               | 1.479 (0.846–2.586)   | 0.170          |                       |                |
| Platelet, <90 vs ≥90 × 10 <sup>3</sup> /μL     | 3.636 (2.193–6.027)   | < 0.001        | 2.716 (1.625–4.540)   | 0.0001         |
| AST, per U/L                                   | 0.999 (0.997–1.000)   | 0.068          |                       |                |
| ALT, per U/L                                   | 0.998 (0.996–0.999)   | 0.006          |                       |                |
| AAR                                            | 2.590(1.825–3.677)    | < 0.0001       |                       |                |
| Total bilirubin, per mg/dL                     | 0.947 (0.827–1.085)   | 0.435          |                       |                |
| Albumin, per g/L                               | 0.386 (0.260–0.573)   | < 0.001        |                       |                |
| INR, per ratio                                 | 2.088 (1.001–4.355)   | 0.050          |                       |                |
| AFP at baseline, ≥5 vs <5 ng/mL                | 2.968 (1.625–5.423)   | < 0.001        | 2.169 (1.171–4.018)   | 0.0139         |
| HBsAg at baseline, per log <sub>10</sub> IU/mL | 0.793 (0.595–1.056)   | 0.112          |                       |                |

Abbreviations: AFP, alpha-fetoprotein; ALT, alanine aminotransferase; CI, confidence interval; AAR, AST/ALT ratio; HBV, hepatitis B virus; HBeAg, hepatitis B e antigen; HBsAg, hepatitis B surface antigen; HCC, hepatocellular carcinoma; INR, international normalized ratio; VR, virological response.

**Supplementary Table 3: AUROC for predicting hepatocellular carcinoma within the initial 5 years of entecavir treatment by using different parameters in the development group ( $n = 883$ )**

| Factors                                  | AUROC (95% CI)        |
|------------------------------------------|-----------------------|
| Age at baseline                          | 0.695 (0.631–0.759)*  |
| Age at 12 months                         | 0.695 (0.631–0.759)*  |
| Platelet at baseline                     | 0.773 (0.714–0.831)** |
| Platelet at 12 months                    | 0.832 (0.782–0.882)** |
| AFP at baseline                          | 0.365 (0.306–0.425)** |
| AFP at 12 months                         | 0.776 (0.716–0.836)** |
| APA-B at baseline (logistic regression)  | 0.807 (0.755–0.859)*  |
| APA-B at 12 months (logistic regression) | 0.863 (0.819–0.908)*  |

\*:  $P < 0.05$  for the AFA-B score at 12 months vs any other parameter.

†:  $P < 0.05$  for platelet at baseline vs platelet at 12 months of treatment.

‡:  $P < 0.05$  for AFP at baseline vs AFP at 12 months of treatment.

Abbreviations: AFP, alpha-fetoprotein; AUROC, area under the receiver operating characteristic curve; CI, confidence interval.

**Supplementary Table 4: Accuracy of predicting hepatocellular carcinoma within the initial 5 years of entecavir treatment in the development and validation groups by using the cutoff value of  $\geq 6$  in the APA-B score**

|                           | APA-B score $\geq 6$      |                          |
|---------------------------|---------------------------|--------------------------|
|                           | Development ( $n = 883$ ) | Validation ( $n = 442$ ) |
| Sensitivity               | 78.3%                     | 90.3%                    |
| Specificity               | 80.0%                     | 79.1%                    |
| Positive predictive value | 22.2%                     | 24.6%                    |
| Negative predictive value | 98.1%                     | 99.1%                    |

**Supplementary Table 5:  $P$  values of AUROC and C-statistic comparisons between the APA-B score and each risk score**

|             | APA-B vs CU-HCC | APA-B vs REACH-B I | APA-B vs REACH-B II | APA-B vs PAGE-B |
|-------------|-----------------|--------------------|---------------------|-----------------|
| 2 years     | 0.161           | 0.002              | 0.002               | 0.071           |
| 3 years     | 0.066           | < 0.001            | < 0.001             | 0.013           |
| 4 years     | 0.003           | < 0.001            | < 0.001             | < 0.001         |
| 5 years     | 0.018           | < 0.001            | < 0.001             | 0.001           |
| C-statistic | < 0.001         | < 0.001            | < 0.001             | < 0.001         |

Abbreviations: AUROC, area under the receiver operating characteristic curve.
